# Supplementary material for: Complex two-gene modulation of lung disease severity in children with cystic fibrosis
Source: JCI journal article supplement (doi:10.1172/jci33754), 2008-02-01
Supplement: sd1 [file 1]

## Supplemental Methods

### Genotyping

#### MBL2

The target SNPs were amplified in multiplexed PCR reactions using a HotStar Taq Polymerase Kit (Qiagen) with the following conditions: 2.5mM MgCl<sub>2</sub>, 0.25mM dNTPs, 10nmole of each primer and 0.25U of the polymerase and 50ng of genomic DNA. For some multiplexed PCR reactions 1X Q solution was added to increase the specificity of reaction (Table 2). The MJ Research PTC 225 Thermocycler conditions were as follows: initial activation at 95<sup>0</sup>C for 15 min, followed by 32 cycles of 94<sup>0</sup>C for 30 sec, 59<sup>0</sup>C for 90 sec, 72<sup>0</sup>C for 1 min. The amplicons were treated with mixture of Shrimp Alkaline Phosphatase and Exonuclease (1U/20μl reaction each) for 1hour at 37<sup>0</sup>C and 95<sup>0</sup>C for 5 min. The Allele Specific Primer Extension (ASPE) reactions were performed using Platinum *Tsp* Polymerase (Invitrogen) with 1.5 mM MgCl<sub>2</sub>, 0.25 mM dNTPs (except biotin-dCTP at 0.1mM) and mixed ASPE primers (0.1pmole each, Table 2). The cyclor conditions were as follows: initial denaturation at 95<sup>0</sup>C for 2 min, followed by 16 cycles of 94<sup>0</sup>C for 10 sec, annealing at 62<sup>0</sup>C, decreasing 0.5<sup>0</sup>C with each cycle for 1 min, extension at 72<sup>0</sup>C for 30 sec, followed by 16 cycles of 94<sup>0</sup>C for 10 sec, annealing at 55<sup>0</sup>C for 1 min, extension at 72<sup>0</sup>C for 30 sec. The ASPE reactions were hybridized with Luminex FlexMap100 beads (1250 of each bead/well) in 50μl 1X Wash Buffer (10X contains 2M NaCl, 1M Tris, 0.8% Triton X-100). Hybridization was performed 92<sup>0</sup>C for 2 min followed by 37<sup>0</sup>C for 30-60 min. The hybridized beads were filtered through a Millipore MultiScreen filter plate on a vacuum station and were washed once with 150μl of 1X Wash Buffer and developed with Streptavidin-Phycoerythrin (0.15μl /reaction) in 150μl of 1X Wash Buffer with shaking for 10 min. The reactions were analyzed on the Luminex LiquiChip Flowcytometry Reader. The raw

data were exported to the internal database where alleles were annotated using a proprietary algorithm.

The genotyping data generated by the method described above was verified by sequencing.

#### Measuring of MBL2 levels in plasma

The MBL2 LiquiChip assay was developed in house based on the 131-01 monoclonal antibodies (AntibodyShop). Since active MBL2 is only capable of binding Mannose in multimeric form and all missense mutations in the *MBL2* gene abolish the multimerization of the mutant MBL2 protein, we developed a bead based assay that utilizes the same antibody for binding (131-01) and detection (131-01B, biotin modified). To couple the LiquiChip Activated Beads (Qiagen, Cat. No: 922543) to the antibodies the bead stock was vortexed for 30 sec at full speed and another 30 min in the dark to completely resuspend the beads. 100  $\mu$ l of LiquiChip Activated Beads suspension was pipetted into a 1.5 ml siliconized polypropylene copolymer reaction microtubes (Fisher Scientific, cat. no. 3544350). The antibody was diluted in coupling buffer (50 mM MES, pH 6.5) to a concentration of 0.2 mg/ml in a volume of 50  $\mu$ l (10  $\mu$ g protein) and was added to the beads. The beads were incubated for 2hr in the dark at room temperature with shaking. The bead suspension was centrifuged for 3 min at 10,000 x g and the supernatant was removed stepwise in small aliquots to minimize bead loss. Beads were washed by resuspension in 500  $\mu$ l of PBS and after centrifugation for 3 min at 10,000 x g the supernatant was discarded. The beads were stored in 100  $\mu$ l PBS/1% BSA at a concentration  $1.25 \times 10^5$  beads/ml at 4°C in the dark. Plasma samples were cleared by centrifugation for 5 min at full speed, the supernatant was additionally filtered through a Millipore MultiScreen filter plate by centrifugation at 3500rpm for 5 min. The samples were diluted at least 1:2, e.g. 50 $\mu$ l plasma plus 100 $\mu$ l of

LiquiChip Human Serum Dilution Buffer (Qiagen, Cat No: 922300) and loaded on the Millipore MultiScreen filter plates. Next 20  $\mu$ l beads mixture (diluted 1/20 in PBS/BSA, equivalent to 1250 beads per well) was added per well, mixed for 10 sec on a microplate shaker at 850rpm and incubated for 2 hours in the dark at room temperature while shaking. The beads were washed twice - drained on vacuum, resuspended in 150 $\mu$ l PBS-TW, vortexed and vacuumed again. The biotinylated secondary antibodies were diluted in PBS-TW (1:5000 for 131-01B) and 100 $\mu$ l of diluted antibodies was added to each well and incubated for 1.5 hours in the dark at room temperature on a microplate shaker at 850 rpm. The reactions were developed with addition of 100 ng Streptavidin–R-PE in a volume of 10  $\mu$ l, incubated for 30 min in the dark. The reactions were analyzed on Luminex<sup>100</sup> LiquiChip Reader, according to manufacturer instructions. Minimum of 100 beads were counted for each analyte and Mean Fluorescence Index (MFI) values were calculated by the software.

### **Supplemental References**

Madsen HO, Garred P, Thiel S, Kurtzhals JA, Lamm LU, Ryder LP, Svejgaard A. Interplay between promoter and structural gene variants control basal serum level of mannan-binding protein. *J Immunol.* 1995 Sep 15;155(6):3013-20.

Taylor JD, Briley D, Nguyen Q, Long K, Iannone MA, Li MS, Ye F, Afshari A, Lai E, Wagner M, Chen J, Weiner MP. Flow cytometric platform for high-throughput single nucleotide polymorphism analysis. *Biotechniques.* 2001 Mar;30(3):661-6, 668-9.

Ye F, Li MS, Taylor JD, Nguyen Q, Colton HM, Casey WM, Wagner M, Weiner MP, Chen J. Fluorescent microsphere-based readout technology for multiplexed human single nucleotide polymorphism analysis and bacterial identification. *Hum Mutat.* 2001 Apr;17(4):305-16.

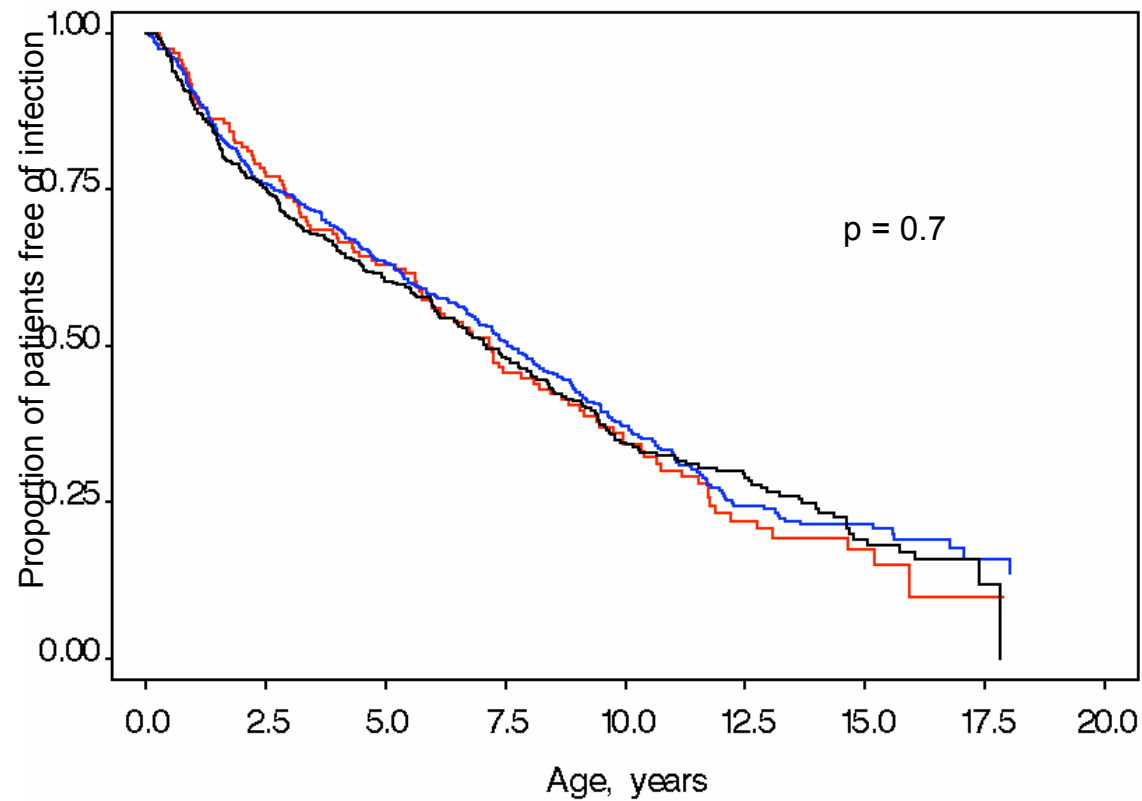

**Supplemental Figure 1.** The age at first infection with *P. aeruginosa* in the pediatric CF cohort (n=1003; <18.5 years) stratified by the *TGFB1* genotype of codon10, showed no effect of polymorphism in the *TGFB1* gene on the onset of infection ( $p = 0.7$ ).

**Supplemental Table 1.** Primer sequences for the PCR amplification of DNA fragments containing four *MBL2* gene variants and for ASPE primers.

| <b>PCR primers</b>           |                                                   |
|------------------------------|---------------------------------------------------|
| MBL_ex1F                     | CCTGTAGCTCTCCAGGCATC                              |
| MBL_ex1R                     | CAGGCAGTTTCCTCTGGAAG                              |
| MBL_XY promoterF             | CACCTGGGTTTCCACTCATT                              |
| MBL_XY promoterR             | CCTTGTGACACTGCGTGACT                              |
| rs1800469/TGFB1(-509)F       | GTTGAGTGACAGGAGGCTGCTT                            |
| rs1800469/TGFB1(-509)R       | AGGCTGGGAAACAAGGTAGGAG                            |
| rs2241715/TGFB1(intron)F     | CAATCCTCTTCTCCCAACA                               |
| rs2241715/TGFB1(intron)R     | TACTCAGCAAACCCCAAAGG                              |
| <b>ASPE primers</b>          |                                                   |
| rs1800469/TGFB1(-509)T:12*   | TACACTTTCTTTCTTTCTTTCTTTGCCTCCTGACCCTTCCATCCT     |
| rs1800469/TGFB1(-509)C:94*   | CTTTCTATCTTTCTACTCAATAATGCCTCCTGACCCTTCCATCCC     |
| rs2241715/TGFB1(intron)C:6*  | CTTTTACAATACTTCAATACAATCAGACAGACCTCCCGCCCTGGGAGAG |
| rs2241715/TGFB1(intron)G:20* | CTTTTACAATACTTCAATACAATCAGACAGACCTCCCGCCCTGGGAGAG |
| rs1800451/MBL57G:59*         | TCATCAATCAATCTTTTTCACTTTACCTGGTTCCCCCTTTTCTC      |
| rs1800451/MBL57A:30*         | TTACCTTTTATACCTTTCTTTTTTACACCTGGTTCCCCCTTTTCTT    |
| rs5030737/MBL52C:28*         | CTACAAACAAACAAACATTATCAACTTCCCAGGCAAAGATGGGC      |
| rs5030737/MBL52T:46*         | TACATCAACAATTCATTCAATACACTTCCCAGGCAAAGATGGGT      |
| rs1800450/MBL54C:12*         | TACACTTTCTTTCTTTCTTTCTTTTTCCCCCTTTTCTYCCTTGGTGC   |
| rs1800450/MBL54T:37*         | CTTTTCATCTTTTCATCTTTCAATTTCCCCCTTTTCTYCCTTGGTGT   |
| rs7096206/MBL_XY_C:30*       | TTACCTTTTATACCTTTCTTTTTTACCCATTTCTTCTCACTGCCACC   |
| rs7096206/MBL_XY_G:59*       | TCATCAATCAATCTTTTTCACTTTCCATTTCTTCTCACTGCCACG     |

\* Please note: 1. First 21 bp correspond to an anti-Zip sequence of code indicated by the last two digits in the end of ASPE primer name. 2. For tagging the ASPE primers TagIT™ program (TmBioscience) was used: <https://tagit.luminexcorp.com/tagit/welcome.jsp>. 3. All ASPE reactions were done in separate multiplexed to avoid primer-dimer formation, therefore the same codes for Zip tags were used.

**Supplemental Table 2.** Allelic, genotypic and diplotypic frequencies in the CF patient and parent cohorts

| <i>MBL2</i> promoter variant X and Y |        |        |         |        |         |         |         |         |         |        |         |         |
|--------------------------------------|--------|--------|---------|--------|---------|---------|---------|---------|---------|--------|---------|---------|
| Patients                             |        |        |         |        |         | Parents |         |         |         |        |         |         |
| Allele                               | X      |        | Y       |        | X       |         | Y       |         |         |        |         |         |
| Frequency                            | 21.50  |        | 78.50   |        | 22.17   |         | 77.83   |         |         |        |         |         |
| <i>MBL2</i> variants A, B,C and D    |        |        |         |        |         |         |         |         |         |        |         |         |
| Patients                             |        |        |         |        |         | Parents |         |         |         |        |         |         |
| Allele                               | 0      |        | A       |        | 0       |         | A       |         |         |        |         |         |
| Frequency                            | 21.07  |        | 78.93   |        | 21.58   |         | 78.42   |         |         |        |         |         |
| <i>MBL2</i> XY genotypes             |        |        |         |        |         |         |         |         |         |        |         |         |
| Patients                             |        |        |         |        |         | Parents |         |         |         |        |         |         |
| Genotype                             | XX     |        | XY      |        | YY      |         | XX      |         | XY      |        | YY      |         |
| Frequency                            | 63     |        | 473     |        | 857     |         | 27      |         | 212     |        | 361     |         |
| N (%)                                | (4.52) |        | (33.96) |        | (61.52) |         | (4.50)  |         | (35.33) |        | (60.17) |         |
| <i>MBL2</i> A0 genotypes             |        |        |         |        |         |         |         |         |         |        |         |         |
| Patients                             |        |        |         |        |         | Parents |         |         |         |        |         |         |
| Genotype                             | 00     |        | A0      |        | AA      |         | 00      |         | A0      |        | AA      |         |
| Frequency                            | 52     |        | 483     |        | 858     |         | 20      |         | 219     |        | 361     |         |
| N (%)                                | (3.73) |        | (34.67) |        | (61.60) |         | (3.33)  |         | (36.50) |        | (60.17) |         |
| <i>MBL2</i> diplotypes               |        |        |         |        |         |         |         |         |         |        |         |         |
| Patients                             |        |        |         |        |         |         | Parents |         |         |        |         |         |
| Diplotype                            | 00 **  | A0 XY  | A0 YY   | AA XX  | AA XY   | AA YY   | 00 **   | A0 XY   | A0 YY   | AA XX  | AA XY   | AA YY   |
| Frequency                            | 52     | 123    | 360     | 63     | 350     | 445     | 20      | 62      | 157     | 27     | 150     | 184     |
| N (%)                                | (3.73) | (8.83) | (25.84) | (4.52) | (25.13) | (31.95) | (3.33)  | (10.33) | (26.17) | (4.50) | (25.00) | (30.67) |

**Supplemental Table 3.** Pair-wise comparison of normalized MBL2 levels between CF patient and parents by the diplotype group.

| Diplotype | Median and SD in parents | Median and SD in CF patients | Delta _median | p-value |
|-----------|--------------------------|------------------------------|---------------|---------|
| 00 YY     | -1.14 ± 0.32             | -0.98 ± 0.36                 | 0.16          | 0.20    |
| A0 XY     | -1.13 ± 0.41             | -0.86 ± 0.70                 | 0.27          | <0.0001 |
| A0 YY     | -0.33 ± 0.59             | 0.03 ± 0.70                  | 0.36          | <0.0001 |
| AA XX     | 0.21 ± 0.77              | 0.97 ± 0.70                  | 0.76          | 0.0007  |
| AA XY     | 1.02 ± 0.57              | 1.46 ± 0.69                  | 0.44          | <0.0001 |
| AA YY     | 1.38 ± 0.58              | 1.68 ± 0.65                  | 0.30          | <0.0001 |

**Supplemental Table 4.** CFTR alleles in 1019 PI patients analyzed in the study.

| Mutation    | Number of chromosomes | Proportion (%) |
|-------------|-----------------------|----------------|
| ΔF508       | 1546                  | 75.86          |
| 621+1G>T    | 57                    | 2.80           |
| G542X       | 42                    | 2.06           |
| N1303K      | 30                    | 1.47           |
| G551D       | 29                    | 1.42           |
| M1101K      | 24                    | 1.18           |
| ΔI507       | 20                    | 0.98           |
| 711+1G>T    | 17                    | 0.83           |
| S489X       | 15                    | 0.74           |
| G85E        | 12                    | 0.59           |
| W1282X      | 11                    | 0.54           |
| R553X       | 10                    | 0.49           |
| Y1092X      | 9                     | 0.44           |
| 1154insTC   | 7                     | 0.34           |
| 2183AA>G    | 7                     | 0.34           |
| R1162X      | 7                     | 0.34           |
| 3659delC    | 6                     | 0.29           |
| Q1313X      | 6                     | 0.29           |
| Q493X       | 6                     | 0.29           |
| 4016insT    | 5                     | 0.25           |
| 1717-1G>A   | 4                     | 0.20           |
| 2184insA    | 4                     | 0.20           |
| 3120+1G>A   | 4                     | 0.20           |
| 3905insT    | 4                     | 0.20           |
| S4X         | 4                     | 0.20           |
| 3876delA    | 3                     | 0.15           |
| P574H       | 3                     | 0.15           |
| R560T       | 3                     | 0.15           |
| S549N       | 3                     | 0.15           |
| 1138insG    | 2                     | 0.10           |
| 2184delA    | 2                     | 0.10           |
| 3007delG    | 2                     | 0.10           |
| 394delTT    | 2                     | 0.10           |
| 406-1G>A    | 2                     | 0.10           |
| A559T       | 2                     | 0.10           |
| CFTRdele2-4 | 2                     | 0.10           |
| E585X       | 2                     | 0.10           |
| E60X        | 2                     | 0.10           |
| F508C       | 2                     | 0.10           |
| G480S       | 2                     | 0.10           |
| L1254X      | 2                     | 0.10           |
| Q220X       | 2                     | 0.10           |
| Q814X       | 2                     | 0.10           |
| R1066C      | 2                     | 0.10           |
| R1158X      | 2                     | 0.10           |
| R709X       | 2                     | 0.10           |



|                |      |        |
|----------------|------|--------|
| R75X           | 2    | 0.10   |
| R785X          | 2    | 0.10   |
| V520F          | 2    | 0.10   |
| 1078delT       | 1    | 0.05   |
| 1161delC       | 1    | 0.05   |
| 1249-27delTA   | 1    | 0.05   |
| 1288insTA      | 1    | 0.05   |
| 1525-1G>A      | 1    | 0.05   |
| 1717-1G>T      | 1    | 0.05   |
| 2622+1G>A      | 1    | 0.05   |
| 2789+5G>A      | 1    | 0.05   |
| 2951insA       | 1    | 0.05   |
| 3199del6       | 1    | 0.05   |
| 3447delG       | 1    | 0.05   |
| 3600G>A        | 1    | 0.05   |
| 3617delGA      | 1    | 0.05   |
| 3662delA       | 1    | 0.05   |
| 3850-3T>G      | 1    | 0.05   |
| 4022insT       | 1    | 0.05   |
| 4089delA       | 1    | 0.05   |
| 557delT        | 1    | 0.05   |
| C276X          | 1    | 0.05   |
| CFTRdele10     | 1    | 0.05   |
| CFTRdele17a-18 | 1    | 0.05   |
| CFTRdele2      | 1    | 0.05   |
| G458V          | 1    | 0.05   |
| H199R          | 1    | 0.05   |
| I148T/3199del6 | 1    | 0.05   |
| L1077P         | 1    | 0.05   |
| L206W          | 1    | 0.05   |
| L218X          | 1    | 0.05   |
| L468P          | 1    | 0.05   |
| Q483X          | 1    | 0.05   |
| Q890X          | 1    | 0.05   |
| R1070Q         | 1    | 0.05   |
| S1118C         | 1    | 0.05   |
| S466X          | 1    | 0.05   |
| S549R          | 1    | 0.05   |
| V1240G/R75Q    | 1    | 0.05   |
| W1274X         | 1    | 0.05   |
| Negative       | 63   | 3.09   |
| TOTAL          | 2038 | 100.00 |

Overall distribution of 1019 CFTR genotypes:

$\Delta F508/\Delta F508$  = 611

$\Delta F508/Other$  = 324

$Other/Other$  = 84

where “Other” is a mutation listed in the table or ”negative”.

Supplemental Table 5. Member institutions of the Canadian Consortium for CF Genetic Studies

| <b>Institution</b>                                    | <b>Location</b>                     |
|-------------------------------------------------------|-------------------------------------|
| Alberta Children's Hospital                           | Calgary, Alberta, Canada            |
| BC Children's Hospital                                | Vancouver, British Columbia, Canada |
| Centre Hospitalier de Gatineau.                       | Gatineau, Quebec, Canada            |
| Centre Hospitalier de L'Universite                    | Laval, Quebec, Canada               |
| Centre Hospitalier Regional de L'Outaouais            | Hull, Quebec, Canada                |
| Centre Hospitalier Regional de Rimouski               | Rimouski, Quebec, Canada            |
| Centre Universitaire de Sante de L'Estrie             | Fleurimont, Quebec, Canada          |
| Children's Hospital of Eastern Ontario                | Ottawa, Ontario, Canada             |
| Children's Hospital of Western Ontario                | London, Ontario, Canada             |
| Children's Hospital of Winnipeg - Pediatric CF Clinic | Winnipeg, Manitoba, Canada          |
| Foothills Medical Centre - Adult CF Clinic            | Calgary, Alberta, Canada            |
| Grand River Hospital                                  | Kitchener, Ontario, Canada          |
| Hamilton Health Science Centre - Pediatric CF Clinic  | Hamilton, Ontario, Canada           |
| Hamilton Health Science Centre - Adult CF Clinic      | Hamilton, Ontario, Canada           |
| Health Sciences Centre-Adult CF Clinic                | Winnipeg, Manitoba, Canada          |
| Hopital de Chicoutimi                                 | Chicoutimi, Quebec, Canada          |
| Hopital Sainte-Justine                                | Montreal, Quebec, Canada            |
| Hospital for Sick Children                            | Toronto, Ontario, Canada            |
| Hospital Pediatric Clinic                             | Saskatoon, Saskatchewan, Canada     |
| Hospitalier Rouyn-Noranda                             | Rouyn-Noranda, Quebec, Canada       |
| Hotel Dieu de Montreal                                | Montreal, Quebec, Canada            |
| Hotel Dieu Hospital                                   | Kingston, Ontario, Canada           |
| IWK Health Centre- Pediatric Clinic                   | Halifax, Nova Scotia, Canada        |
| Janeway Children's Health Centre                      | St. John's, Newfoundland, Canada    |
| Montreal Chest Institute                              | Montreal, Quebec, Canada            |
| Montreal Children's Hospital                          | Montreal, Quebec, Canada            |
| Ottawa Genera Hospital                                | Ottawa, Ontario, Canada             |
| Queen Elisabeth Health Sciences Centre -Adult Clinic  | Halifax, Nova Scotia, Canada        |
| Regina General Hospital                               | Regina, Saskatchewan, Canada        |
| Royal Jubilee Hospital                                | Victoria, British Columbia, Canada  |
| Royal University Hospital - Adult Clinic              | Saskatoon, Saskatchewan, Canada     |
| Royal University Hospital - Pediatric Clinic          | Saskatoon, Saskatchewan, Canada     |
| St. John Regional Hospital.                           | St. John, NB, Canada                |
| St. Michael's Hospital                                | Toronto, Ontario, Canada            |
| St. Paul's Adult CF Clinic                            | Vancouver, British Columbia, Canada |
| Sudbury Regional Hospital                             | Sudbury, Ontario, Canada            |
| University of Alberta Adult Clinic                    | Edmonton, Alberta, Canada           |
| University of Alberta Pediatric Clinic                | Edmonton, Alberta, Canada           |
| Victoria General Hospital                             | Victoria, British Columbia, Canada  |
